# Supplementary material for: Distinct functional domains of Dystroglycan regulate inhibitory synapse formation and maintenance in cerebellar Purkinje cells
Source: PubMed Central journal article supplement (PMC11383678; doi:10.1101/2024.08.29.610348), 2024-08-30
Supplement: NIHPP2024.08.29.610348v1-supplement-1.pdf [file NIHPP2024.08.29.610348v1-supplement-1.pdf]

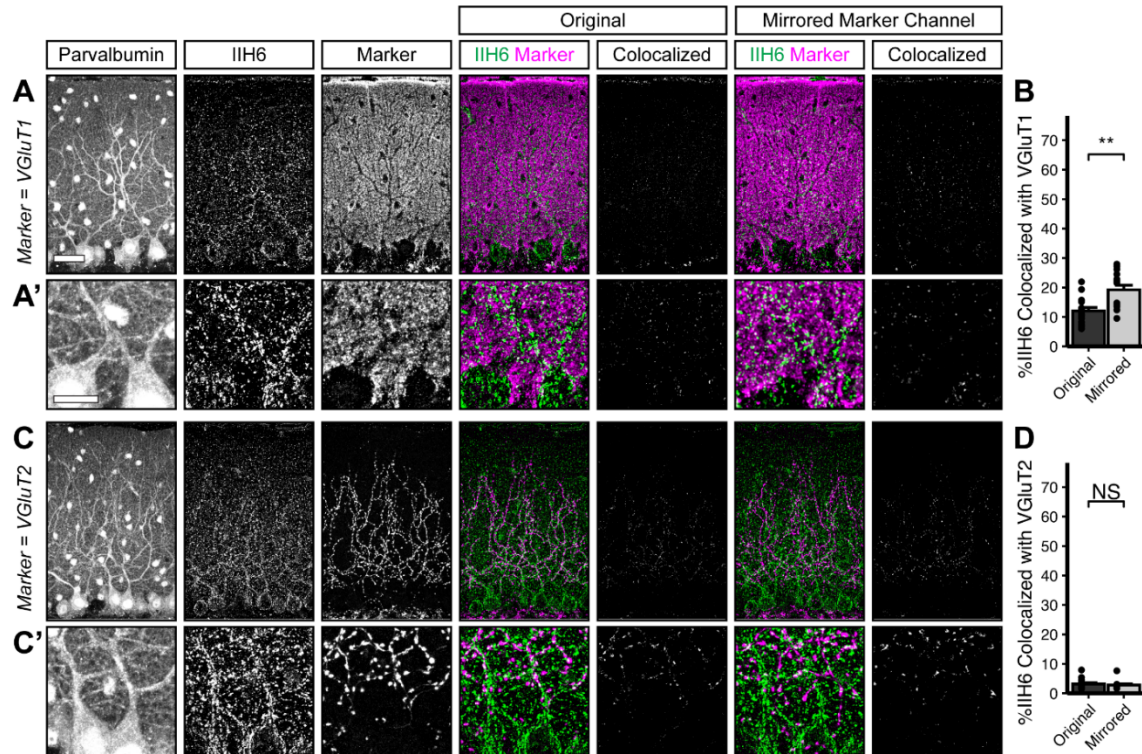

### Supplemental Figure 1. Dystroglycan does not co-localize with markers of excitatory synapses.

Cerebellar cortex of lobules V-VI were immunostained with Parvalbumin to show Purkinje cell and MLI morphology and counterstained with IIH6 (glycosylated Dystroglycan) and VGlut1 (parallel fibers) (A) or VGlut2 (climbing fibers) (C). Both the merged channels (IIH6, green; VGlut1/VGlut2, magenta) and colocalized pixels are shown for the original image and for original IIH6 with the mirrored VGlut1/VGlut2 channel. Images are maximum projections. (B, D) Quantification of the percent of IIH6 puncta that are colocalized with VGlut1/VGlut2 puncta. Scale bar for (A, C) is 50µm; scale bar for insets (A', C') is 25µm. VGlut1 N = 15 images, 3 animals. VGlut2 N = 15 images, 3 animals.

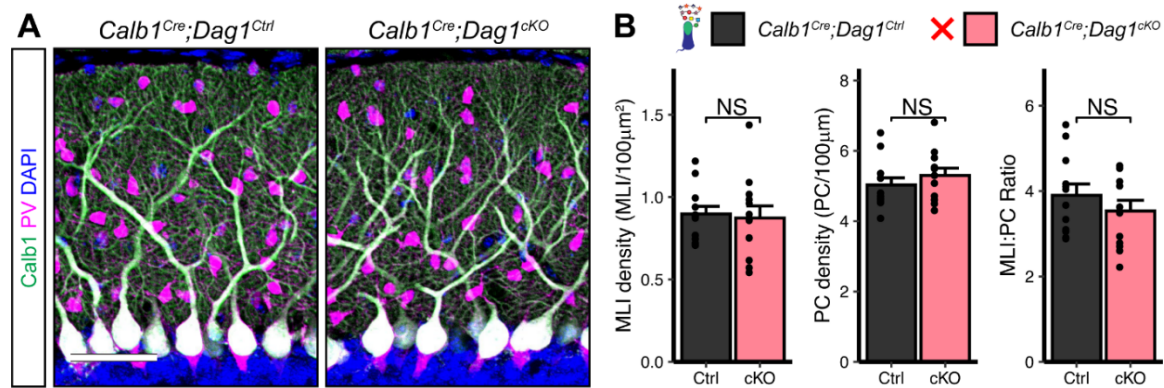

**Supplemental Figure 2. Purkinje and MLI cell counts are unchanged in *Calb1<sup>Cre</sup>;Dag1<sup>cKO</sup>*.**

**(A)** *Calb1<sup>Cre</sup>;Dag1<sup>cKO</sup>* and littermate controls immunostained for Calbindin (Purkinje cells, green) and Parvalbumin (Purkinje cells and MLIs, magenta). Nuclei are shown in blue. Images are maximum projections. Scale bar = 50 $\mu$ m. **(B)** Quantification of MLI density, Purkinje cell density, and the ratio of MLIs to Purkinje cells. Error bars represent mean + SEM. *Calb1<sup>Cre</sup>;Dag1<sup>Ctrl</sup>* N = 12 ROIs, 6 images, 3 animals. *Calb1<sup>Cre</sup>;Dag1<sup>cKO</sup>* N = 12 ROIs, 6 images, 3 animals.

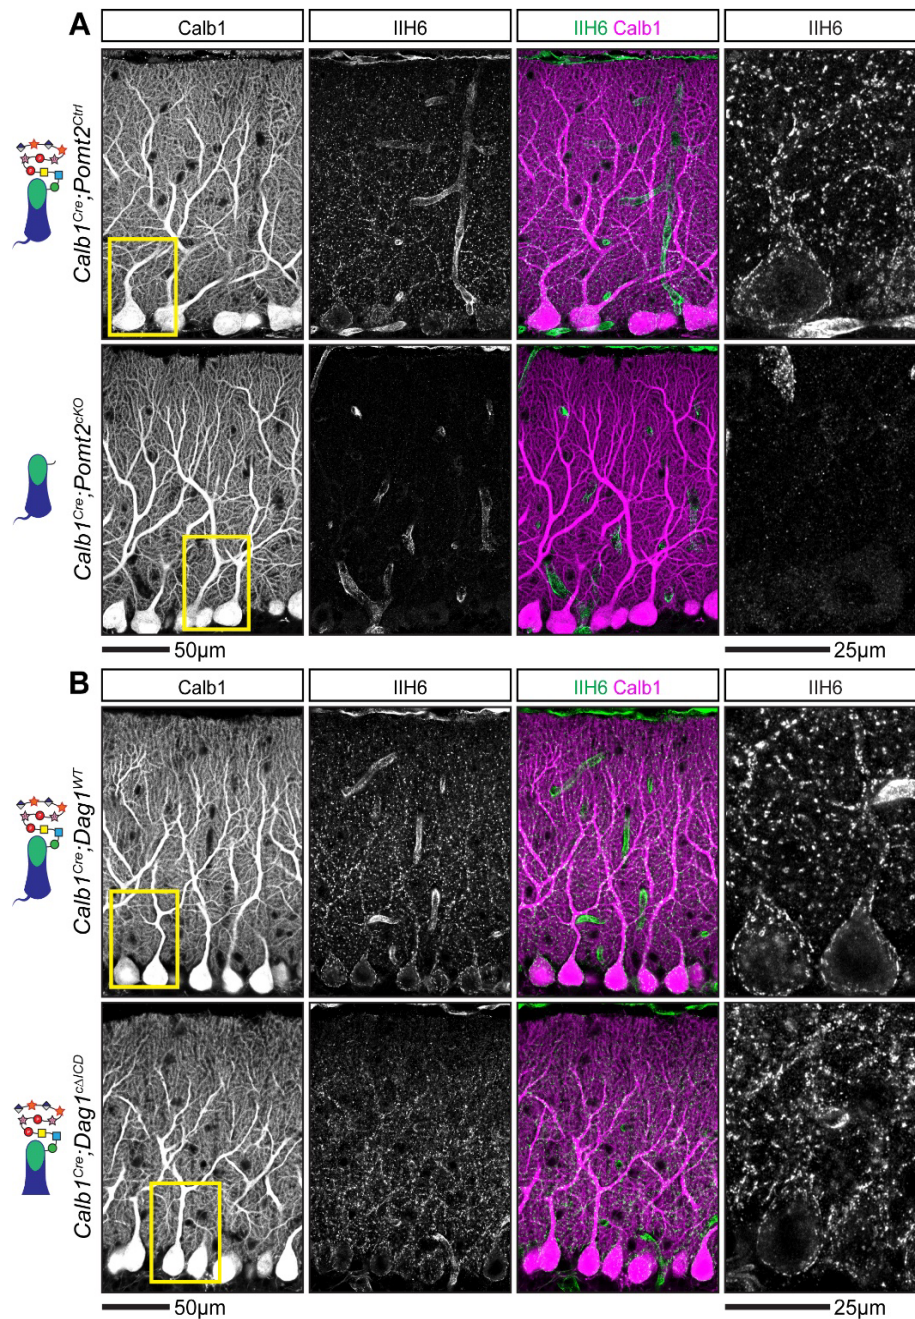

**Supplemental Figure 3. Localization of matriglycan chains on Dystroglycan in *Calb1<sup>Cre</sup>;Pomt2<sup>cKO</sup>* and *Calb1<sup>Cre</sup>;Dag1<sup>cΔICD</sup>* Purkinje cells.**

(A-B) Cerebellar sections from *Calb1<sup>Cre</sup>;Pomt2<sup>cKO</sup>* and littermate controls (A) or *Calb1<sup>Cre</sup>;Dag1<sup>cΔICD</sup>* and littermate controls (B) were immunostained for Calbindin (magenta), to visualize Purkinje cells, along with IIH6 (green), to visualize matriglycan chains on Dystroglycan. The rightmost panel represents a magnified view of the area outlined in yellow in the leftmost low magnification panel. Images are maximum projections.
